# Supplementary material for: Evaluating the cation binding strength and selectivity of calix[4]pyrroles: a computational and ESI-MS/MS study
Source: Royal Society of Chemistry journal article supplement (doi:10.1039/c4cp01647e), 2014-01-01
Supplement: c4cp01647e1.pdf [file c4cp01647e1.pdf]

# Electronic Supplementary Information TYPE

# ARTICLE

## Evaluating the Cation Binding Strength and Selectivity of Calix[4]pyrroles: A Computational and ESI-MS/MS Study

Chinthapalli Dinesh Kumar,<sup>a</sup> Bhaskar Sharma<sup>b</sup>, Yarasi Soujanya,<sup>b</sup> Vadla Naresh Chary,<sup>a</sup> Santhosh Reddy Patpi,<sup>c</sup> Srinivas Kantevari,<sup>c,d</sup> Sripadi Prabhakar,<sup>\*a,d</sup> and Garikapati Narahari Sastry<sup>\*b,d</sup>

5

<sup>a</sup>National Centre for Mass Spectrometry, CSIR-Indian Institute of Chemical Technology, Hyderabad, India. Fax: +91 40 2719 3156; Tel: +91 40 2719 1343; E-mail: prabhakar@iict.res.in

<sup>b</sup>Centre for Molecular Modeling, CSIR-Indian Institute of Chemical Technology, Hyderabad, India.

<sup>c</sup>Organic Chemistry Division II (C P C Division), CSIR- Indian Institute of Chemical Technology, Hyderabad, India.

10 <sup>d</sup>Academy of Scientific and Innovative Research, CSIR-Indian Institute of Chemical Technology, Hyderabad, India.

### Table of Contents

|           |                                                                                                                                                                                                                                                                                           |
|-----------|-------------------------------------------------------------------------------------------------------------------------------------------------------------------------------------------------------------------------------------------------------------------------------------------|
| Figure S1 | Plot of Binding Energies with and without BSSE for all [1+X] <sup>+</sup> complexes at M052X/6-31g(d) for Li <sup>+</sup> , Na <sup>+</sup> , K <sup>+</sup> and with effective core potentials and valence basis sets of Hay and Wadt for Rb <sup>+</sup> and Cs <sup>+</sup> complexes. |
| 15        |                                                                                                                                                                                                                                                                                           |
| Figure S2 | AIM topological graph for the parent complex and fragments of [1+Li] <sup>+</sup> at B3LYP/6-31G* level of theory.                                                                                                                                                                        |
| Figure S3 | AIM topological graph for the parent complex and fragments of [1+Na] <sup>+</sup> at B3LYP/6-31G* level of theory.                                                                                                                                                                        |
| Figure S4 | CID product ion spectra of a) [1+Li] <sup>+</sup> , m/z 435 b) [1+Na] <sup>+</sup> , m/z 451 c) [1+K] <sup>+</sup> , m/z 467 d) [1+Rb] <sup>+</sup> , m/z 513 e) [1+Cs] <sup>+</sup> , m/z 561 at a collision energy of 30 eV.                                                            |
| Figure S5 | Optimized geometries of <b>1</b> showing cation- $\pi$ distances of various fragments complexed with Li <sup>+</sup> ion calculated at M05-2X/TZVP level of theory.                                                                                                                       |
| Figure S6 | Optimized geometries of <b>1</b> showing cation- $\pi$ distances of various fragments complexed with Na <sup>+</sup> ion calculated at M05-2X/TZVP level of theory.                                                                                                                       |
| Figure S7 | CID dissociation curves for the complexes of <b>1-5</b> with a) Li <sup>+</sup> b) Na <sup>+</sup> c) K <sup>+</sup> d) Rb <sup>+</sup> and e) Cs <sup>+</sup> . The E <sub>com</sub> <sup>50%</sup> values were presented in parentheses (eV).                                           |
| Table S1  | Dihedral angles between two pyrrole rings connected by the methylene group.                                                                                                                                                                                                               |
| Table S2  | Energy components in kcal/mol obtained from LMOEDA technique incorporated in GAMESS software.                                                                                                                                                                                             |
| Table S3  | Electron density ( $\rho$ ) and Laplacian of electron density ( $\nabla^2$ ) at the bond critical points (BCP, R) and cage critical points (CCP, $\pi$ ) obtained for the parent and various fragments of Li, Na and K complexes of CP obtained at B3LYP/6-31G**/M05-2X/6-31G* level.     |
| Table S4  | Binding Energies (BE in kcal/mol) of the precursor ions, [1+X] <sup>+</sup> where X <sup>+</sup> = Li, Na, K, Rb, Cs, and the product ions (fragment ions) computed at B2PLYP/TZVP level of theory.                                                                                       |
| Table S5  | Cartesian coordinates of the complexes considered in the study at M05-2X/TZVP level of theory                                                                                                                                                                                             |

5

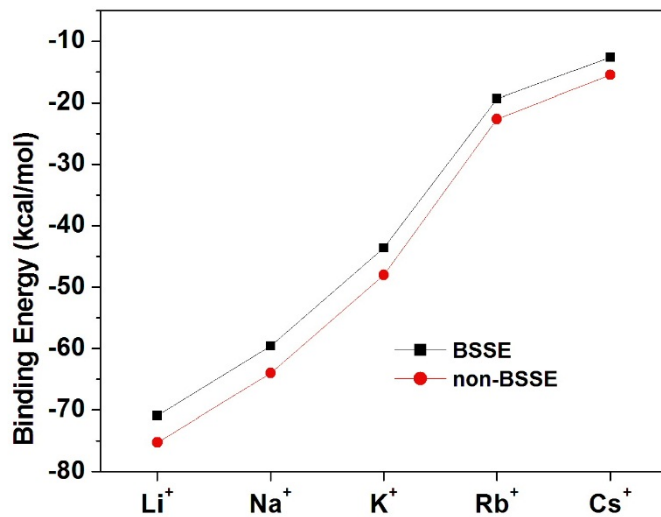

**Figure S1.** Plot of Binding Energies with (■) and without BSSE (●) for all [1+X]<sup>+</sup> complexes at M052X/6-31g(d) for Li<sup>+</sup>, Na<sup>+</sup>, K<sup>+</sup> and with effective core potentials and valence basis sets of Hay and Wadt for Rb<sup>+</sup> and Cs<sup>+</sup> complexes.

10

15

20

25

30

35

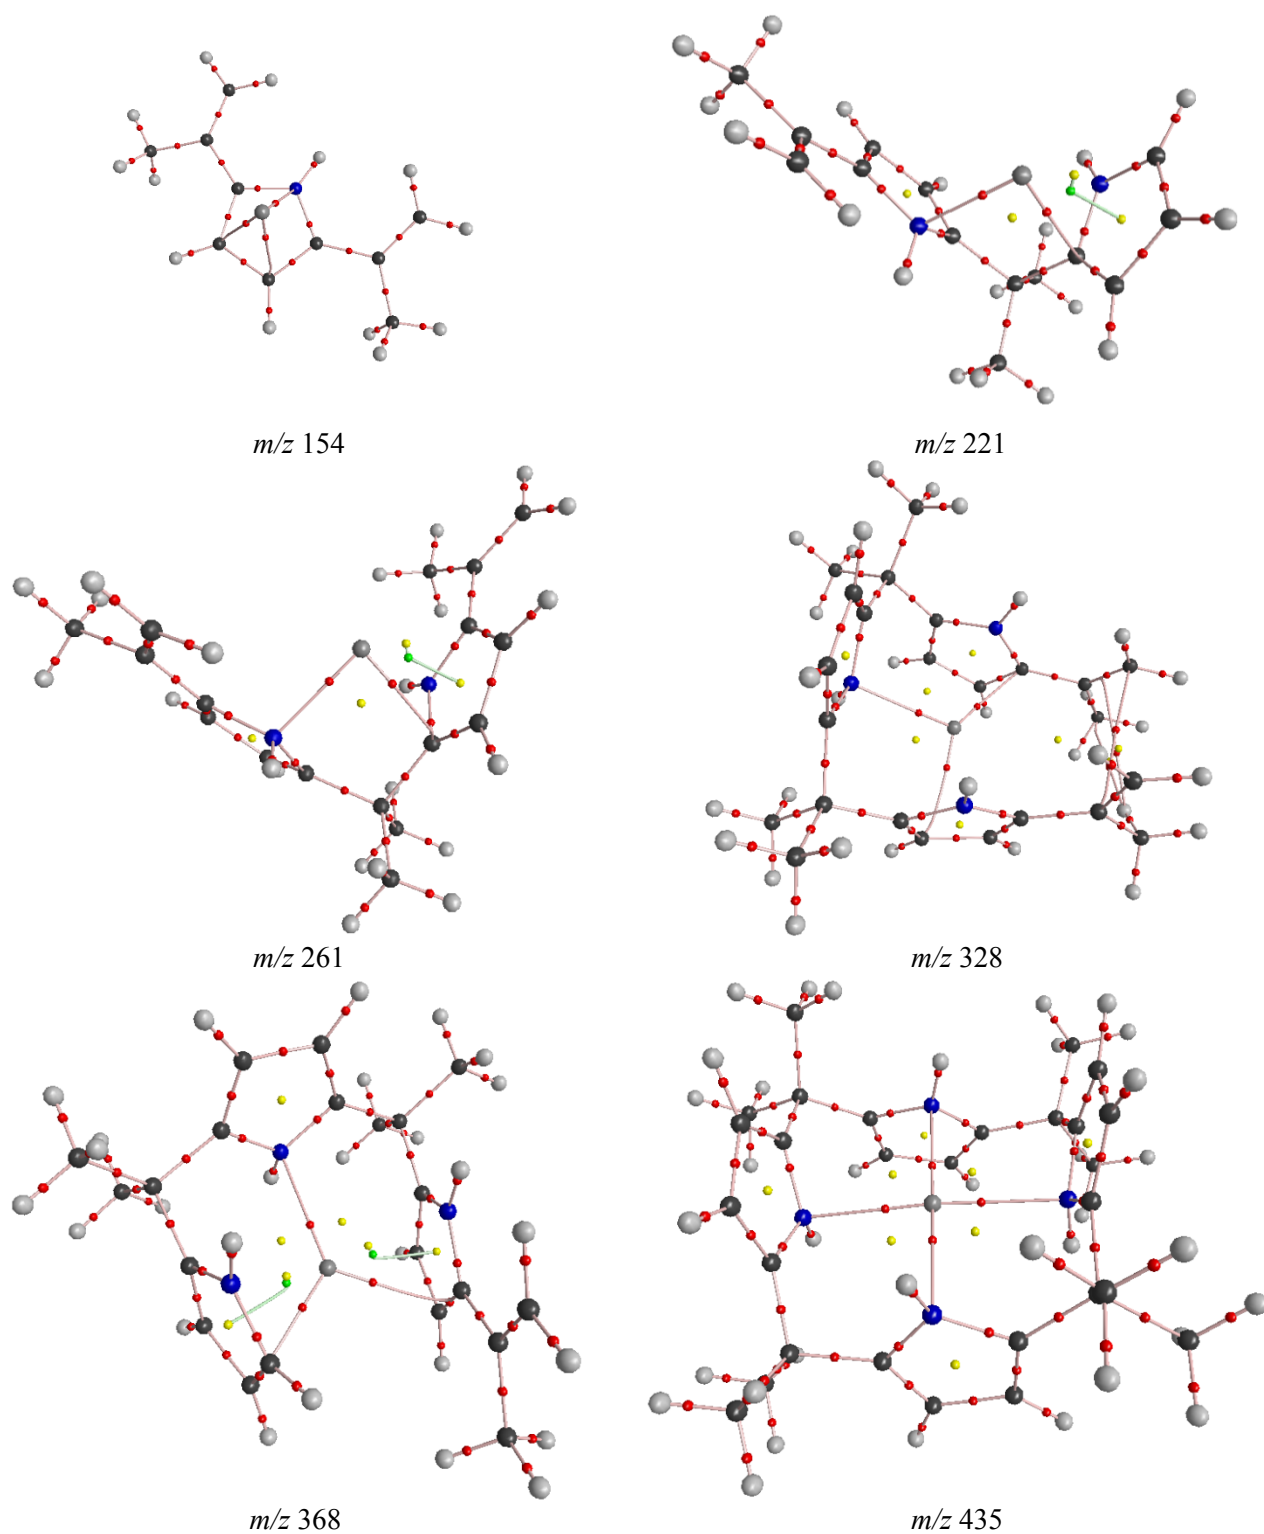

5 **Figure S2.** AIM topological graph for the parent complex and fragments of  $[1+Li]^+$  at B3LYP/6-31G\* level of theory.

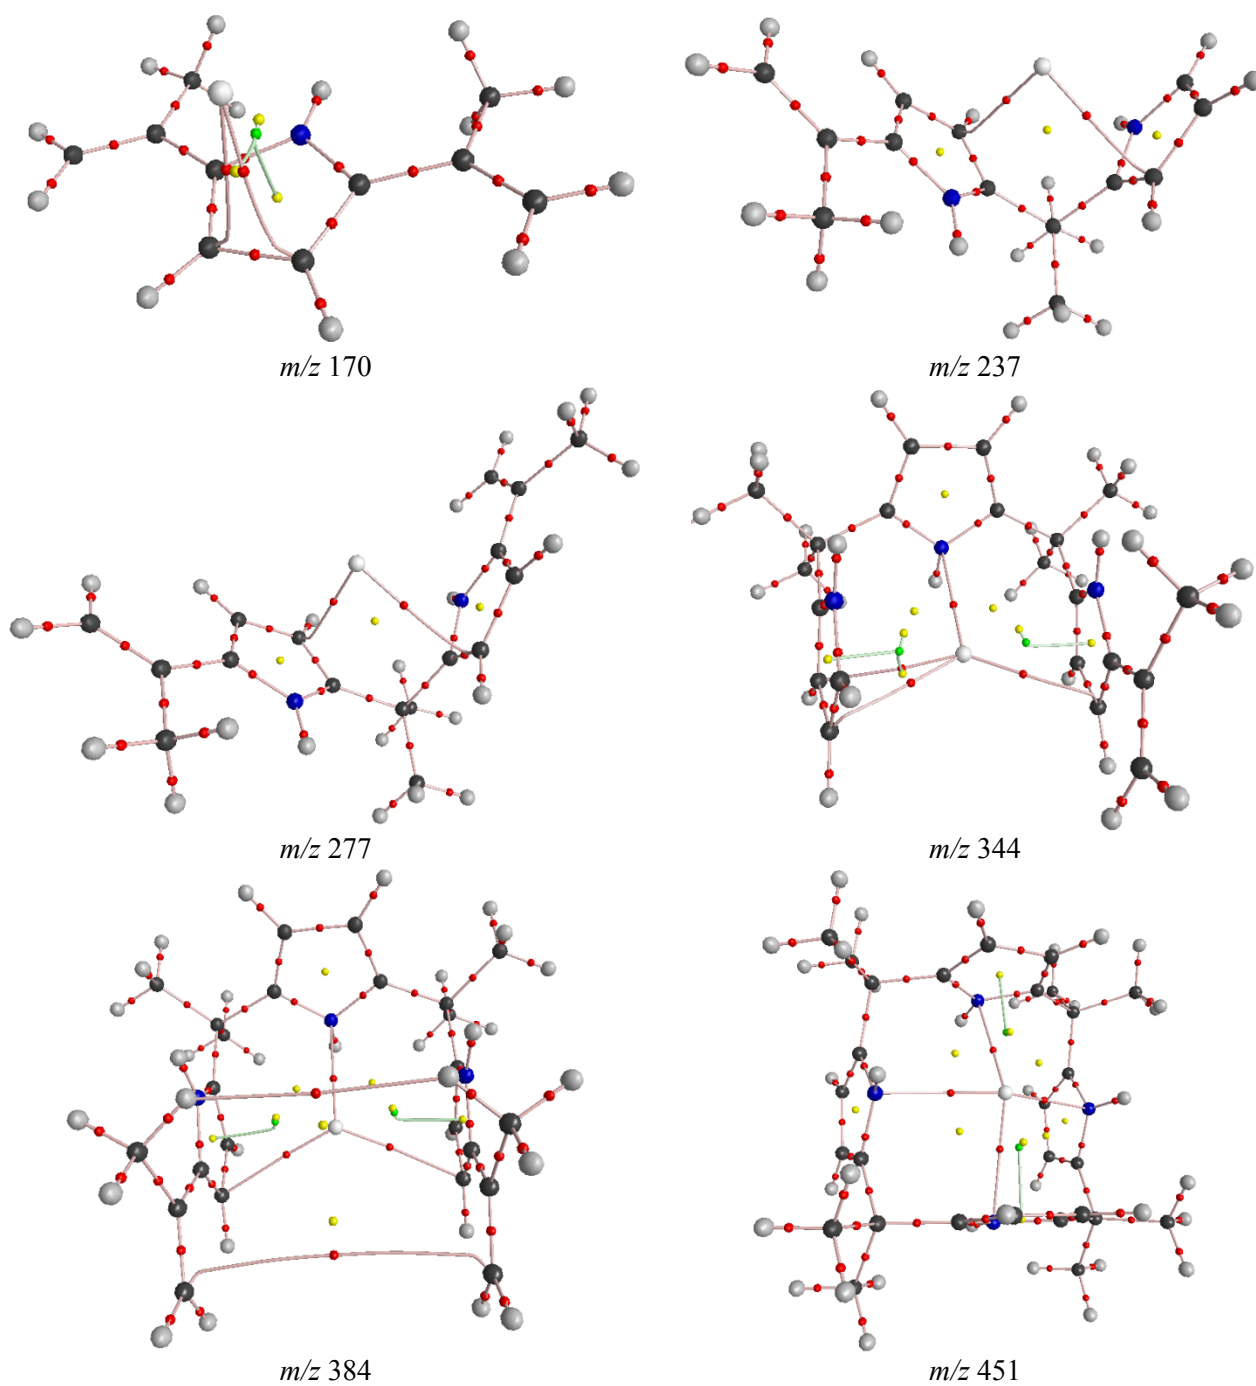

**Figure S3.** AIM topological graph for the parent complex and fragments of  $[1+Na]^+$  at B3LYP/6-31G\* level of theory.

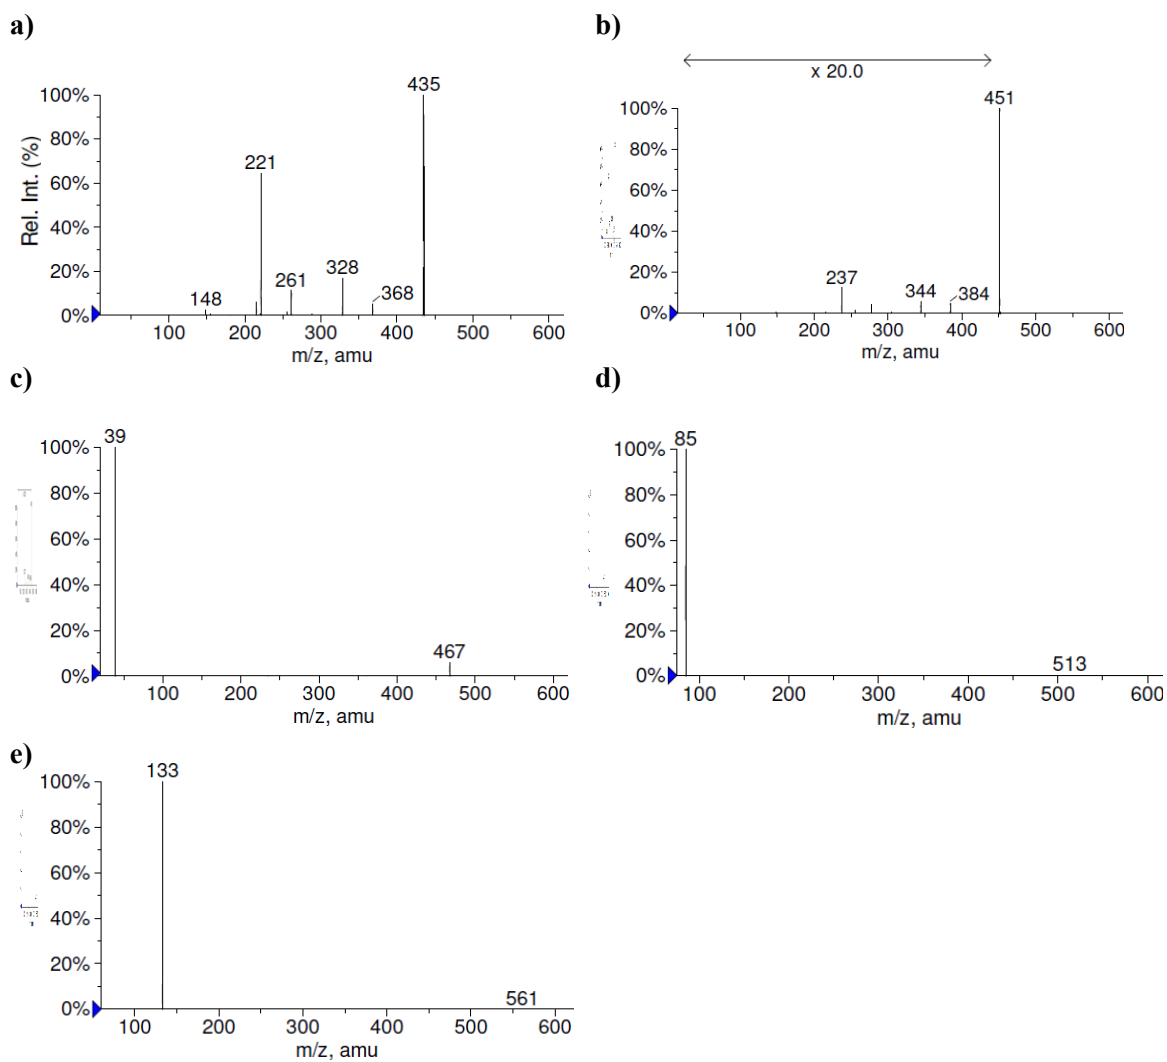

**Figure S4.** CID product ion spectra of a) [1+Li]<sup>+</sup> (m/z 435), b) [1+Na]<sup>+</sup> (m/z 451), c) [1+K]<sup>+</sup> (m/z 467), d) [1+Rb]<sup>+</sup> (m/z 513), and e) [1+Cs]<sup>+</sup> (m/z 561) at a collision energy of 30 eV.

5

10

15

20

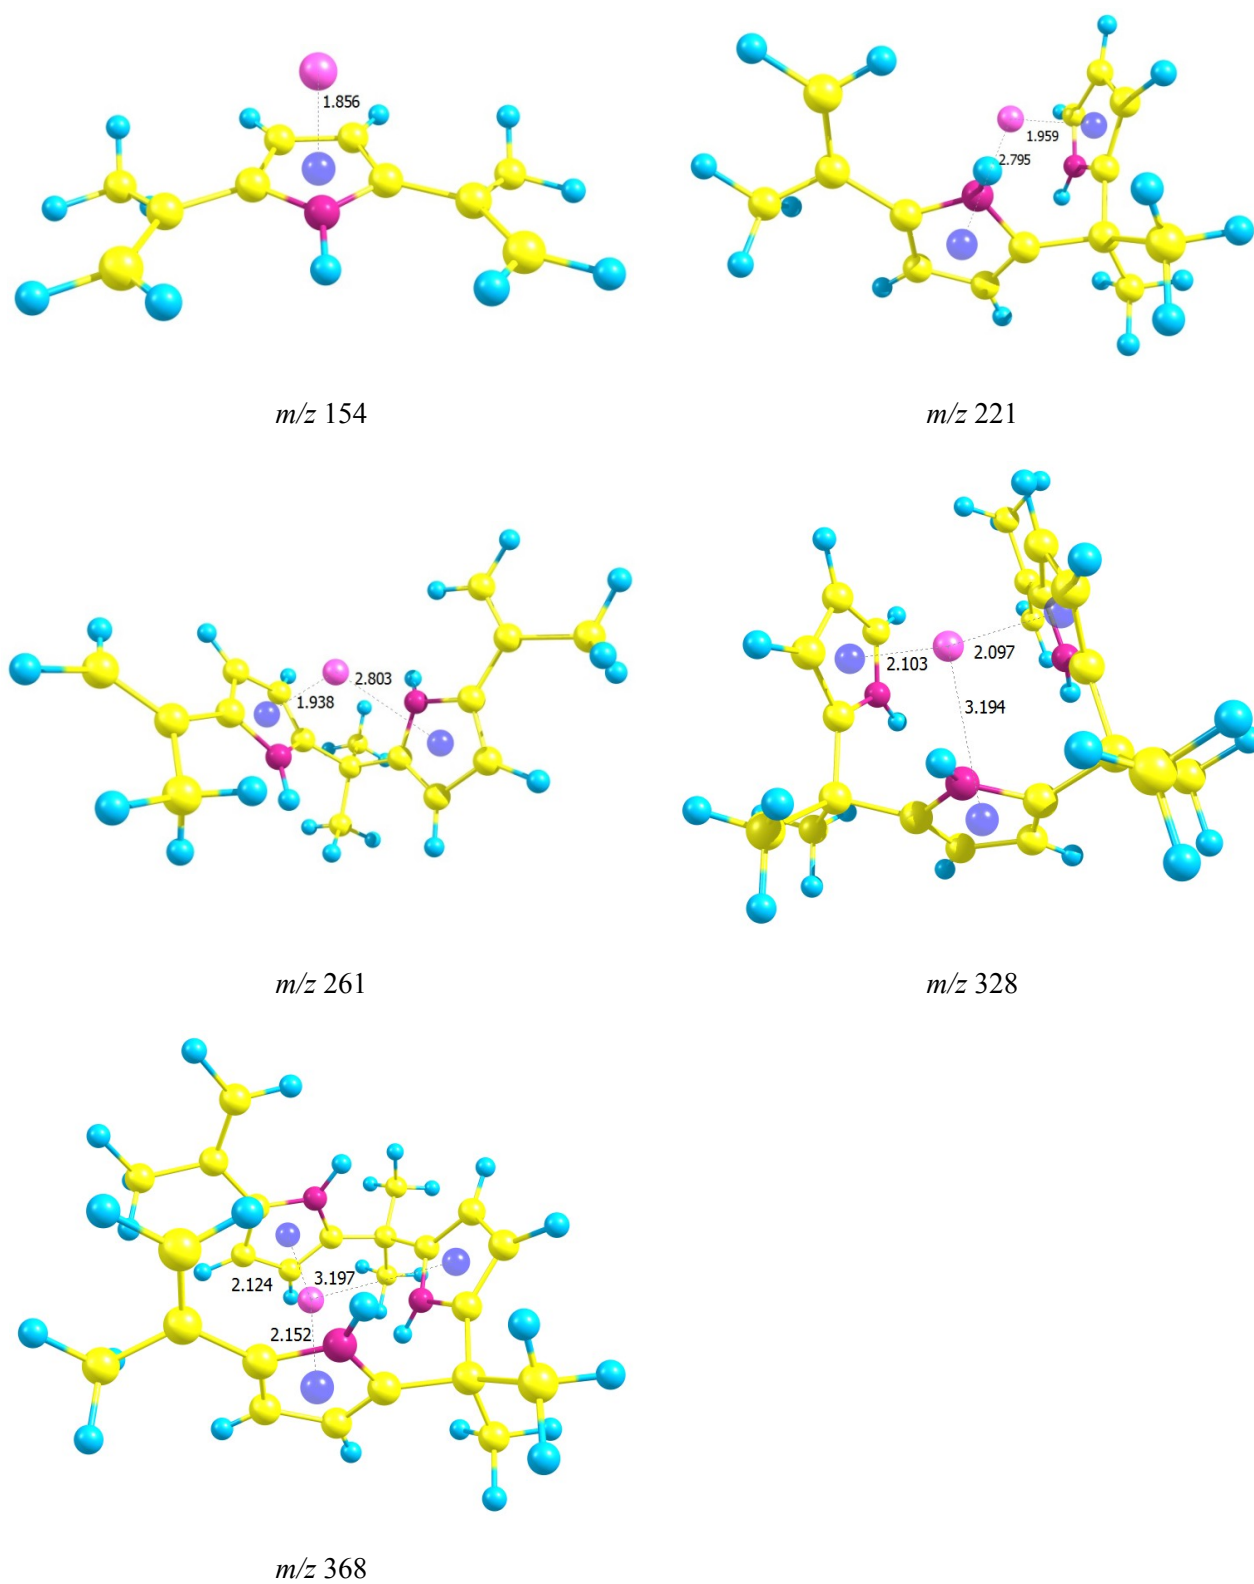

**Figure S5.** Optimized geometries of **1** showing cation to centroid of pyrrole ring distances of various fragments complexed with  $\text{Li}^+$  ion calculated at M05-2X/TZVP level of theory.

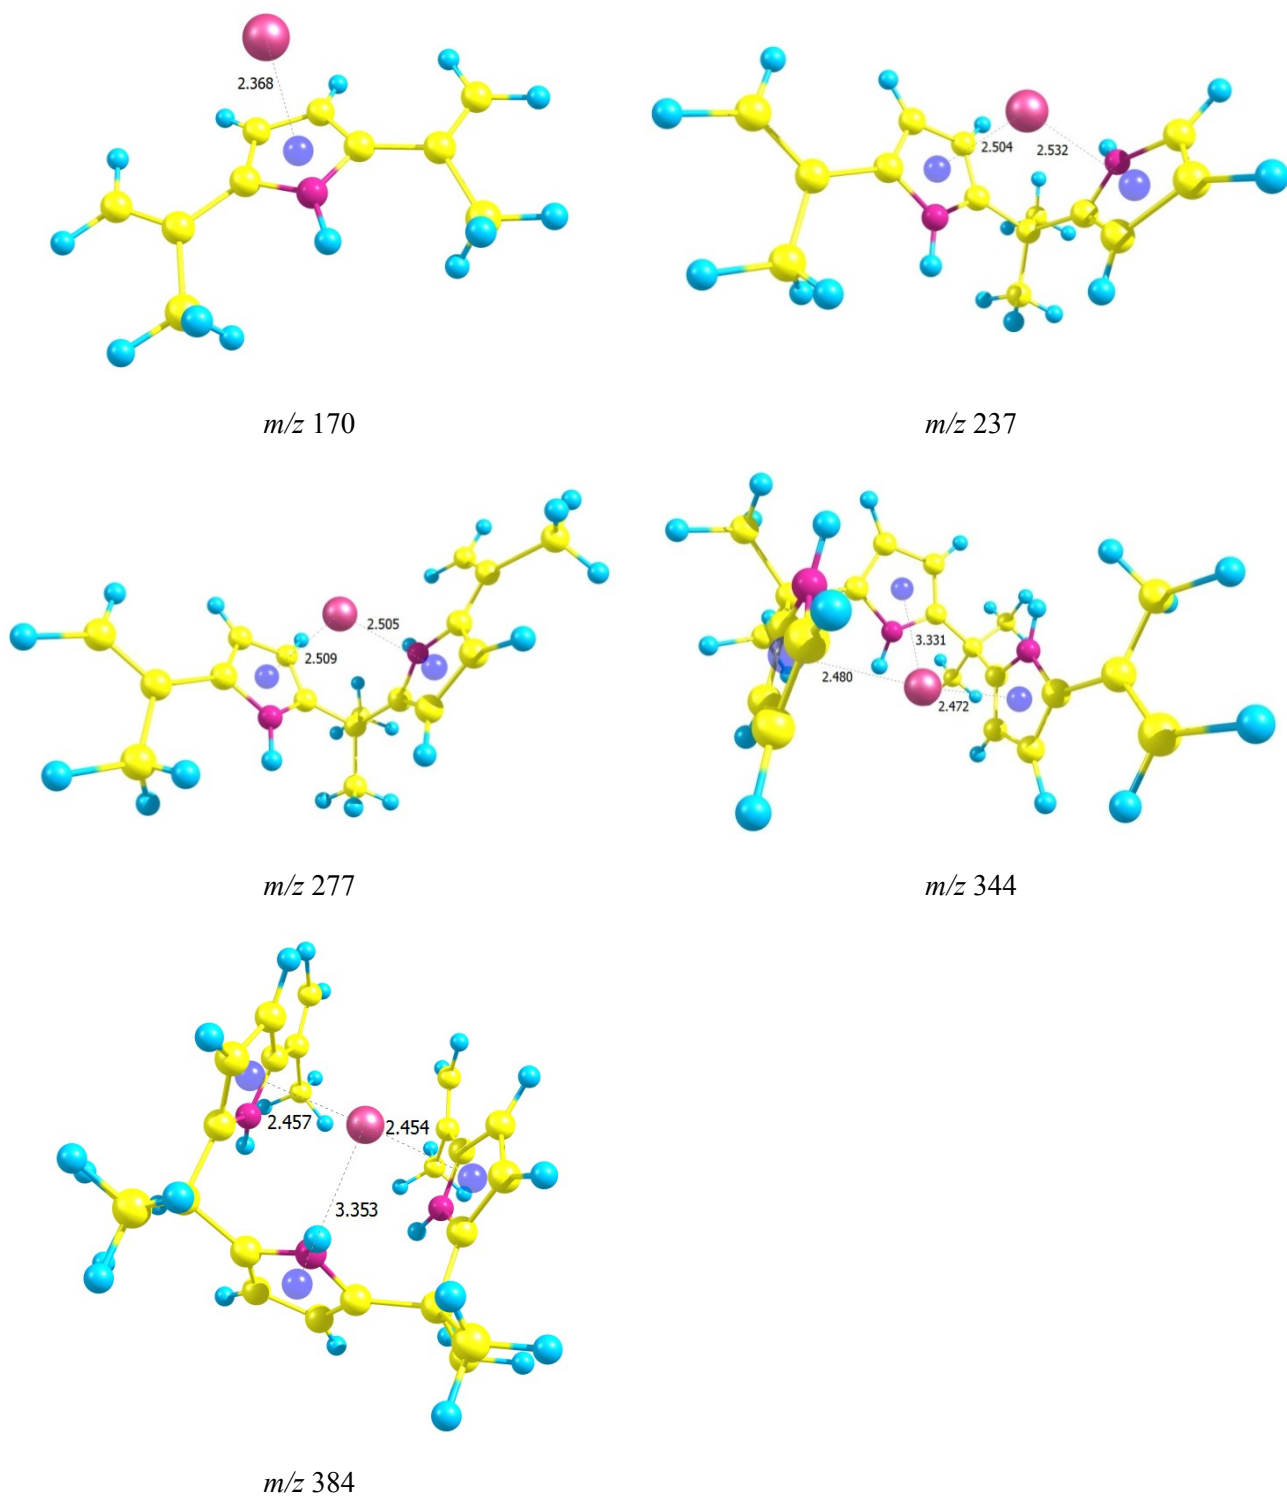

**Figure S6.** Optimized geometries of **1** showing cation to centroid of pyrrole ring distances of various fragments complexed with Na<sup>+</sup> ion calculated at M05-2X/TZVP level of theory.

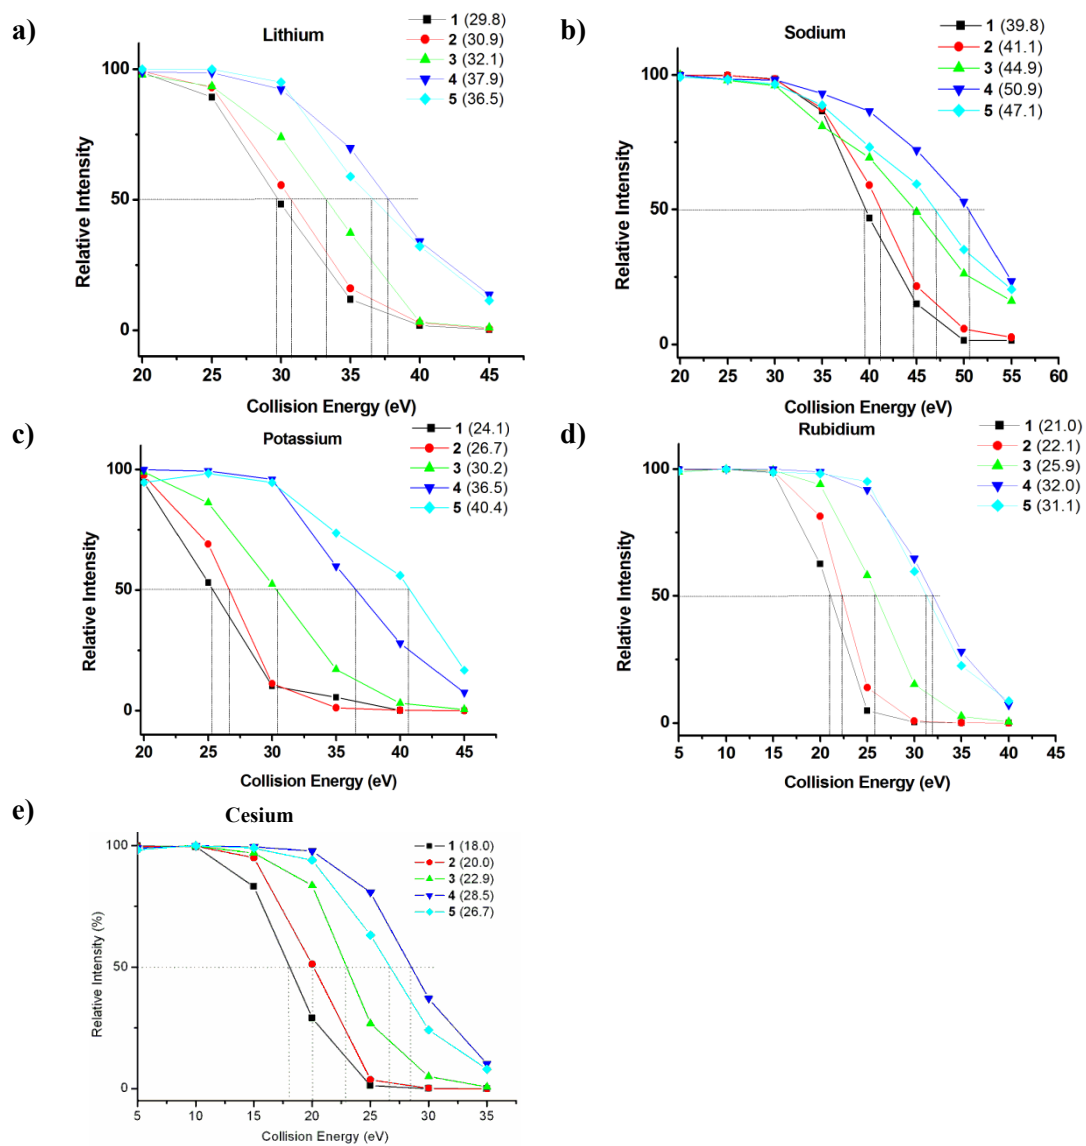

**Figure S7.** CID dissociation curves for the complexes of CP (1-5) with **a) Li<sup>+</sup>** **b) Na<sup>+</sup>** **c) K<sup>+</sup>** **d) Rb<sup>+</sup>** and **e) Cs<sup>+</sup>**. The  $E_{\text{com}}^{50\%}$  values were presented in parentheses (eV).



**Table S1:** Dihedral angles (Å) between two adjacent pyrrole rings connected by the methylene group.<sup>a</sup>

| Complexes               | ab      | ab'      | a'b      | a'b'    |
|-------------------------|---------|----------|----------|---------|
| <b>1</b>                | 127.867 | -127.903 | -127.903 | 127.867 |
| <b>1-Li<sup>+</sup></b> | 110.721 | -133.897 | -133.897 | 110.721 |
| <b>1-Na<sup>+</sup></b> | 108.974 | -111.748 | -111.753 | 108.972 |
| <b>1-K<sup>+</sup></b>  | 98.051  | -98.053  | -98.053  | 98.051  |
| <b>1-Rb<sup>+</sup></b> | 96.601  | -96.588  | -96.590  | 96.604  |
| <b>1-Cs<sup>+</sup></b> | 139.763 | -139.729 | -139.729 | 139.763 |

<sup>a</sup> The atoms chosen to measure the dihedral angle is shown as bold ones in Fig.3

5

**Table S2:** Energy components in kcal/mol obtained from LMOEDA technique incorporated in GAMESS software.

| Complex            | Elec   | Exch  | Rep   | Pol    | Disp   | IE     |
|--------------------|--------|-------|-------|--------|--------|--------|
| CP-Li <sup>+</sup> | -43.47 | -2.36 | 14.61 | -38.09 | -12.79 | -82.09 |
| CP-Na <sup>+</sup> | -44.54 | -3.08 | 23.57 | -25.42 | -19.82 | -69.30 |

10

15

20

25

**Table S3:** Electron density ( $\rho$ ) and Laplacian of electron density ( $\nabla^2$ ) at the bond critical points (BCP, R) and cage critical points (CCP,  $\pi$ ) obtained for the parent and various fragments of Li, Na and K complexes of **1** obtained at B3LYP/6-31G\*\*/M05-2X/6-31G\* level.

5

| Complexes | $\pi_1$ |                | $\pi_2$ |                | $R_a$  |                | $R_{a'}$ |                | $R_b$  |                | $R_{b'}$ |                |
|-----------|---------|----------------|---------|----------------|--------|----------------|----------|----------------|--------|----------------|----------|----------------|
|           | P       | $\nabla^2\rho$ | $\rho$  | $\nabla^2\rho$ | $\rho$ | $\nabla^2\rho$ | $\rho$   | $\nabla^2\rho$ | $\rho$ | $\nabla^2\rho$ | $\rho$   | $\nabla^2\rho$ |
| Li-154    | 0.0168  | -0.270         | x       | x              | 0.0186 | -0.0316        | x        | x              | x      | x              | x        | x              |
| Li-221    | 0.0144  | -0.0217        | -a-     | -a-            | 0.0229 | -0.0319        | 0.0175   | -0.0255        | x      | x              | x        | x              |
| Li-261    | 0.150   | 0.225          | -a-     | -a-            | 0.0227 | -0.0314        | 0.0184   | -0.0272        | x      | x              | x        | x              |
| Li-328    | -a-     | -a-            | -a-     | -a-            | 0.0116 | -0.0136        | 0.0143   | -0.0176        | 0.0128 | -0.0170        | x        | x              |
| Li-368    | 0.0114  | -0.0166        | 0.0116  | -0.0163        | 0.0129 | -0.0154        | 0.0135   | -0.0175        | 0.0133 | -0.0169        | x        | x              |
| Li-Parent | -a-     | -a-            | -a-     | -a-            | 0.0134 | -0.0164        | 0.0134   | -0.0164        | 0.0134 | -0.0164        | 0.0134   | -0.0164        |
| Na-170    | 0.0111  | -0.0163        | x       | x              | 0.0159 | -0.0199        | x        | x              | x      | x              | x        | x              |
| Na-237    | -a-     | -a-            | -a-     | -a-            | 0.0134 | -0.0161        | 0.0132   | -0.0158        | x      | x              | x        | x              |
| Na-277    | -a-     | -a-            | -a-     | -a-            | 0.0125 | -0.0155        | 0.0132   | -0.0160        | x      | x              | x        | x              |
| Na-344    | 0.0096  | -0.0139        | 0.0097  | -0.0138        | 0.0125 | -0.0147        | 0.0118   | -0.0142        | 0.0123 | -0.0148        | x        | x              |
| Na-384    | 0.0084  | -0.0116        | 0.0084  | -0.0116        | 0.0124 | -0.0147        | 0.0114   | -0.0129        | 0.0114 | -0.0129        | x        | x              |
| Na-Parent | 0.0076  | -0.0098        | 0.0076  | -0.0098        | 0.0102 | -0.0135        | 0.0102   | -0.0135        | 0.0126 | -0.0150        | 0.0126   | -0.0150        |
| K-Parent  | 0.0089  | -0.0119        | 0.0089  | -0.0119        | 0.0121 | -0.0134        | 0.0129   | -0.0124        | 0.0121 | -0.134         | 0.0129   | -0.0124        |

<sup>-a-</sup> The corresponding cage critical point is not observed.<sup>x</sup> The corresponding bond critical point is not present.

10

**Table S4:** Binding Energies (BE in kcal/mol) of the precursor ions, [1+X]<sup>+</sup> where X<sup>+</sup> = Li, Na, K, Rb, Cs, and the product ions (fragment ions) computed at B2PLYP/TZVP level of theory.

5

|                      |                                 | <b>Binding Energies</b>     |                             |                             |                             |                             |
|----------------------|---------------------------------|-----------------------------|-----------------------------|-----------------------------|-----------------------------|-----------------------------|
| <b>Precursor ion</b> |                                 | <b>Product ions</b>         |                             |                             |                             |                             |
| 10                   | [1+Li] <sup>+</sup><br>(-74.24) | <i>m/z</i> 154<br>(-44.95)  | <i>m/z</i> 221<br>(-61.88)  | <i>m/z</i> 261<br>(-62.79)  | <i>m/z</i> 328<br>(-74.78)  | <i>m/z</i> 368<br>(-74.81)  |
|                      | [1+Na] <sup>+</sup><br>(-59.55) | <i>m/z</i> 170*<br>(-29.79) | <i>m/z</i> 237<br>(-46.03)  | <i>m/z</i> 277<br>(-46.06)  | <i>m/z</i> 344<br>(-55.88)  | <i>m/z</i> 384<br>(-55.46)  |
| 15                   | [1+K] <sup>+</sup><br>(-46.49)  | <i>m/z</i> 186*<br>(-19.59) | <i>m/z</i> 253*<br>(-22.50) | <i>m/z</i> 293*<br>(-29.73) | <i>m/z</i> 360*<br>(-36.73) | <i>m/z</i> 400*<br>(-38.81) |
| 20                   | [1+Rb] <sup>+</sup><br>(-30.34) | <i>m/z</i> 233*<br>(-16.85) | <i>m/z</i> 299*<br>(-25.79) | <i>m/z</i> 339*<br>(-26.61) | <i>m/z</i> 406*<br>(-34.83) | <i>m/z</i> 446*<br>(-35.31) |
|                      | [1+Cs] <sup>+</sup><br>(-19.22) | <i>m/z</i> 281*<br>(-12.31) | <i>m/z</i> 347*<br>(-8.55)  | <i>m/z</i> 387*<br>(-18.57) | <i>m/z</i> 454*<br>(-19.26) | <i>m/z</i> 494*<br>(-21.91) |

25

\* Ions are not observed experimentally





|    |           |           |           |           |       |           |           |           |           |
|----|-----------|-----------|-----------|-----------|-------|-----------|-----------|-----------|-----------|
| C  | 1.131920  | 2.552931  | -0.730217 | 60        | H     | 3.442976  | 3.689913  | -1.655511 |           |
| C  | 0.713934  | 2.373317  | -2.019127 |           | H     | 4.558512  | 2.654219  | -0.748031 |           |
| H  | 1.349204  | 2.266545  | -2.879308 |           | C     | 2.673870  | 3.575195  | 0.962679  |           |
| C  | 2.506142  | 2.500283  | -0.112036 |           | H     | 1.985757  | 3.437338  | 1.796250  |           |
| 5  | C         | 2.677088  | 1.130151  | 0.503758  |       | H         | 3.684099  | 3.542406  | 1.364283  |
| C  | 3.036408  | 0.714205  | 1.763771  | 65        | H     | 2.506803  | 4.557965  | 0.528487  |           |
| C  | 2.677086  | -1.130159 | 0.503731  |           | K     | 0.000000  | 0.000000  | 1.408302  |           |
| C  | 3.036407  | -0.714243 | 1.763754  |           |       |           |           |           |           |
| H  | 3.309210  | 1.352415  | 2.584645  |           |       |           |           |           |           |
| 10 | H         | 3.309208  | -1.352475 | 2.584611  | Cp-Rb |           |           |           |           |
| N  | 2.454028  | 0.000005  | -0.239088 | 70        | C     | -0.713667 | -2.331686 | 2.155419  |           |
| H  | -0.000013 | 3.040943  | 0.975524  |           | C     | -1.131510 | -2.534371 | 0.870044  |           |
| C  | 2.506137  | -2.500275 | -0.112095 |           | N     | -0.000010 | -2.630202 | 0.084268  |           |
| C  | 1.131900  | -2.552922 | -0.730245 |           | C     | 1.131567  | -2.534402 | 0.869936  |           |
| 15 | C         | -1.131920 | -2.552931 | -0.730217 | 75    | C         | 0.713851  | -2.331698 | 2.155350  |
| C  | -0.713934 | -2.373317 | -2.019127 |           | H     | 1.349379  | -2.209734 | 3.013289  |           |
| C  | 0.713883  | -2.373307 | -2.019144 |           | C     | 2.507934  | -2.498992 | 0.257347  |           |
| C  | -2.506142 | -2.500283 | -0.112036 |           | C     | 2.710917  | -1.129222 | -0.349812 |           |
| C  | -2.677088 | -1.130151 | 0.503758  |           | C     | 3.205864  | -0.713843 | -1.563242 |           |
| 20 | C         | -3.036408 | -0.714205 | 1.763771  | 80    | C         | 2.710914  | 1.129288  | -0.349670 |
| C  | -3.036407 | 0.714243  | 1.763754  |           | C     | 3.205862  | 0.714064  | -1.563152 |           |
| C  | -2.677086 | 1.130159  | 0.503731  |           | H     | 3.565036  | -1.352091 | -2.350064 |           |
| C  | -2.506137 | 2.500275  | -0.112095 |           | H     | 3.565037  | 1.352413  | -2.349891 |           |
| N  | 0.000000  | -2.636830 | 0.056152  |           | N     | 2.409278  | -0.000011 | 0.364550  |           |
| 25 | N         | -2.454028 | -0.000005 | -0.239088 | 85    | H         | -0.000060 | -3.070047 | -0.818263 |
| H  | -1.349204 | -2.266545 | -2.879308 |           | C     | 2.507934  | 2.498978  | 0.257666  |           |
| H  | -3.309210 | -1.352415 | 2.584645  |           | C     | 1.131490  | 2.534382  | 0.870078  |           |
| H  | -3.309208 | 1.352475  | 2.584611  |           | C     | -1.131587 | 2.534403  | 0.869894  |           |
| H  | 0.000013  | -3.040943 | 0.975524  |           | C     | -0.713912 | 2.331657  | 2.155315  |           |
| 30 | H         | 1.349132  | -2.266528 | -2.879340 | 90    | C         | 0.713605  | 2.331758  | 2.155449  |
| H  | -1.349132 | 2.266528  | -2.879340 |           | C     | -2.507932 | 2.498997  | 0.257259  |           |
| H  | -2.109227 | -0.000019 | -1.185651 |           | C     | -2.710902 | 1.129225  | -0.349901 |           |
| H  | 2.109227  | 0.000019  | -1.185651 |           | C     | -3.205824 | 0.713845  | -1.563341 |           |
| 35 | C         | -2.673899 | 3.575216  | 0.962586  | 95    | C         | -3.205823 | -0.714062 | -1.563249 |
| H  | -1.985778 | 3.437408  | 1.796159  |           | C     | -2.710904 | -1.129285 | -0.349754 |           |
| H  | -2.506864 | 4.557978  | 0.528363  |           | C     | -2.507934 | -2.498975 | 0.257586  |           |
| H  | -3.684126 | 3.542405  | 1.364193  |           | N     | 0.000018  | 2.630202  | 0.084264  |           |
| C  | -3.569377 | 2.712234  | -1.195739 |           | N     | -2.409281 | 0.000016  | 0.364471  |           |
| H  | -3.505586 | 1.953760  | -1.972738 |           | H     | -1.349469 | 2.209658  | 3.013227  |           |
| 40 | H         | -4.558492 | 2.654164  | -0.748148 | 100   | H         | -3.564976 | 1.352092  | -2.350173 |
| H  | -3.442952 | 3.689863  | -1.655615 |           | H     | -3.564979 | -1.352412 | -2.349996 |           |
| C  | -2.673870 | -3.575195 | 0.962679  |           | H     | 0.000100  | 3.070031  | -0.818275 |           |
| H  | -1.985757 | -3.437338 | 1.796250  |           | H     | 1.349020  | 2.209834  | 3.013477  |           |
| H  | -3.684099 | -3.542406 | 1.364283  |           | H     | -1.349111 | -2.209711 | 3.013418  |           |
| 45 | H         | -2.506803 | -4.557965 | 0.528487  | 105   | H         | -1.968673 | 0.000078  | 1.271236  |
| C  | -3.569407 | -2.712279 | -1.195648 |           | H     | 1.968640  | -0.000071 | 1.271301  |           |
| H  | -4.558512 | -2.654219 | -0.748031 |           | C     | -2.665222 | -3.572940 | -0.819720 |           |
| H  | -3.505650 | -1.953816 | -1.972660 |           | H     | -1.990329 | -3.415258 | -1.661090 |           |
| H  | -3.442976 | -3.689913 | -1.655511 |           | H     | -2.473497 | -4.554533 | -0.392784 |           |
| 50 | C         | 3.569377  | -2.712234 | -1.195739 | 110   | H         | -3.680244 | -3.560983 | -1.210088 |
| H  | 3.442952  | -3.689863 | -1.655615 |           | C     | -3.562185 | -2.730358 | 1.347012  |           |
| H  | 3.505586  | -1.953760 | -1.972738 |           | H     | -3.562171 | -1.967588 | 2.120269  |           |
| H  | 4.558492  | -2.654164 | -0.748148 |           | H     | -4.554253 | -2.689225 | 0.904118  |           |
| C  | 2.673899  | -3.575216 | 0.962586  |           | H     | -3.416638 | -3.704952 | 1.807894  |           |
| 55 | H         | 3.684126  | -3.542405 | 1.364193  | 115   | C         | -2.665014 | 3.572807  | -0.820234 |
| H  | 1.985778  | -3.437408 | 1.796159  |           | H     | -1.990026 | 3.414949  | -1.661495 |           |
| H  | 2.506864  | -4.557978 | 0.528363  |           | H     | -3.679985 | 3.560856  | -1.210732 |           |
| C  | 3.569407  | 2.712279  | -1.195648 |           | H     | -2.473285 | 4.554455  | -0.393428 |           |
| H  | 3.505650  | 1.953816  | -1.972660 |           |       |           |           |           |           |

|    |           |          |           |           |        |           |           |           |           |
|----|-----------|----------|-----------|-----------|--------|-----------|-----------|-----------|-----------|
| C  | -3.562316 | 2.730604 | 1.346508  | 60        | H      | 1.861717  | 0.000263  | 1.369155  |           |
| H  | -4.554326 | 2.689455 | 0.903488  |           | H      | -1.861763 | -0.000421 | 1.369117  |           |
| H  | -3.506442 | 1.967945 | 2.119884  |           | C      | 2.649731  | 3.569510  | -0.668579 |           |
| H  | -3.416779 | 3.705259 | 1.807264  |           | H      | 1.981623  | 3.394021  | -1.512216 |           |
| 5  | C         | 3.562152 | 2.730357  | 1.347125  | H      | 2.440353  | 4.550753  | -0.248963 |           |
|    | H         | 3.416593 | 3.704950  | 1.808005  | 65     | H         | 3.666115  | 3.573134  | -1.055308 |
|    | H         | 3.506111 | 1.967585  | 2.120379  | C      | 3.559200  | 2.746900  | 1.501630  |           |
|    | H         | 4.554234 | 2.689222  | 0.904263  | H      | 3.512604  | 1.984074  | 2.275330  |           |
| 10 | C         | 2.665261 | 3.572943  | -0.819634 | H      | 4.551278  | 2.716789  | 1.057882  |           |
|    | H         | 3.680296 | 3.560981  | -1.209968 | H      | 3.401672  | 3.720477  | 1.960826  |           |
|    | H         | 1.990396 | 3.415264  | -1.661026 | 70     | C         | 2.650821  | -3.570041 | -0.666611 |
|    | H         | 2.473526 | 4.554536  | -0.392705 | H      | 1.983159  | -3.395287 | -1.510749 |           |
|    | C         | 3.562282 | -2.730594 | 1.346631  | H      | 3.667444  | -3.573583 | -1.052720 |           |
|    | H         | 3.506384 | -1.967931 | 2.120003  | H      | 2.441478  | -4.551079 | -0.246503 |           |
| 15 | H         | 3.416731 | -3.705247 | 1.807387  | C      | 3.558717  | -2.745801 | 1.503638  |           |
|    | H         | 4.554308 | -2.689446 | 0.903643  | 75     | H         | 4.551058  | -2.715657 | 1.060478  |
|    | C         | 2.665054 | -3.572803 | -0.820137 | H      | 3.511415  | -1.982528 | 2.276858  |           |
|    | H         | 1.990093 | -3.414949 | -1.661422 | H      | 3.401213  | -3.719154 | 1.963319  |           |
|    | H         | 3.680038 | -3.560849 | -1.210600 | C      | -3.559247 | -2.747072 | 1.501258  |           |
| 20 | H         | 2.473312 | -4.554452 | -0.393336 | H      | -3.401738 | -3.720699 | 1.960355  |           |
|    | Rb        | 0.000006 | -0.000016 | -1.665695 | 80     | H         | -3.512669 | -1.984329 | 2.275041  |
|    |           |          |           |           | H      | -4.551313 | -2.716908 | 1.057485  |           |
|    |           |          |           |           | C      | -2.649721 | -3.569461 | -0.669009 |           |
|    |           |          |           |           | H      | -3.666096 | -3.573042 | -1.055763 |           |
|    |           |          |           |           | H      | -1.981592 | -3.393887 | -1.512612 |           |
|    |           |          |           |           | 85     | H         | -2.440356 | -4.550748 | -0.249488 |
|    |           |          |           |           | C      | -3.558761 | 2.745623  | 1.503847  |           |
|    |           |          |           |           | H      | -3.511477 | 1.982266  | 2.276986  |           |
|    |           |          |           |           | H      | -3.401263 | 3.718926  | 1.963635  |           |
|    |           |          |           |           | H      | -4.551092 | 2.715529  | 1.060663  |           |
|    |           |          |           |           | 90     | C         | -2.650819 | 3.570090  | -0.666297 |
|    |           |          |           |           | H      | -1.983137 | 3.395426  | -1.510438 |           |
|    |           |          |           |           | H      | -3.667433 | 3.573669  | -1.052430 |           |
|    |           |          |           |           | H      | -2.441489 | 4.551084  | -0.246082 |           |
|    |           |          |           |           | Cs     | 0.000035  | 0.000139  | -1.802081 |           |
|    |           |          |           |           | 95     |           |           |           |           |
|    |           |          |           |           | Li-154 |           |           |           |           |
|    |           |          |           |           | C      | -2.498166 | -0.363921 | -0.087480 |           |
|    |           |          |           |           | 100    | C         | -1.139271 | 0.178424  | -0.014672 |
|    |           |          |           |           | C      | -0.712023 | 1.490553  | 0.084793  |           |
|    |           |          |           |           | C      | 1.139281  | 0.178532  | -0.014676 |           |
|    |           |          |           |           | C      | 0.711957  | 1.490619  | 0.084785  |           |
|    |           |          |           |           | H      | -1.352896 | 2.352711  | 0.121369  |           |
|    |           |          |           |           | 105    | H         | 1.352759  | 2.352834  | 0.121280  |
|    |           |          |           |           | N      | 0.000040  | -0.603447 | -0.030545 |           |
|    |           |          |           |           | C      | 2.498188  | -0.363851 | -0.087322 |           |
|    |           |          |           |           | H      | 0.000110  | -1.581408 | -0.264320 |           |
|    |           |          |           |           | C      | 2.738586  | -1.667504 | 0.023150  |           |
|    |           |          |           |           | 110    | H         | 3.745194  | -2.047070 | -0.053725 |
|    |           |          |           |           | H      | 1.963705  | -2.401159 | 0.193651  |           |
|    |           |          |           |           | C      | 3.585710  | 0.647363  | -0.299983 |           |
|    |           |          |           |           | H      | 3.417650  | 1.203846  | -1.220630 |           |
|    |           |          |           |           | H      | 3.620012  | 1.363399  | 0.520658  |           |
|    |           |          |           |           | 115    | H         | 4.549957  | 0.154562  | -0.361064 |
|    |           |          |           |           | C      | -2.738594 | -1.667684 | 0.021626  |           |
|    |           |          |           |           | H      | -3.745247 | -2.047096 | -0.055406 |           |
|    |           |          |           |           | H      | -1.963725 | -2.401613 | 0.190990  |           |

|    |           |           |           |           |        |           |           |           |           |
|----|-----------|-----------|-----------|-----------|--------|-----------|-----------|-----------|-----------|
| C  | -3.585754 | 0.647505  | -0.298863 | 60        | C      | 2.321788  | -0.317258 | -1.740730 |           |
| H  | -3.619839 | 1.362717  | 0.522503  |           | C      | 1.492163  | 0.836752  | -1.829655 |           |
| H  | -3.417974 | 1.204891  | -1.219017 |           | C      | 3.276849  | -1.641003 | 0.294875  |           |
| H  | -4.550008 | 0.154749  | -0.360197 |           | N      | 1.738662  | 0.306717  | 0.297004  |           |
| 5  | Li        | 0.000177  | 0.377514  | 1.869855  | H      | 2.778812  | -0.837303 | -2.562380 |           |
|    |           |           |           |           | 65     | H         | 1.678212  | 0.346882  | 1.300645  |
|    |           |           |           |           | H      | 1.185307  | 1.331286  | -2.733261 |           |
|    |           |           |           |           | H      | -1.873452 | 0.632408  | -1.318975 |           |
|    | Li-221    |           |           |           | C      | 3.101670  | -1.740290 | 1.783778  |           |
| 10 | C         | 2.454138  | -2.241383 | -0.789251 | H      | 2.060710  | -1.922559 | 2.056052  |           |
|    | C         | 2.596681  | -0.805303 | -1.004556 | 70     | H         | 3.697443  | -2.556896 | 2.176944  |
|    | C         | 2.841769  | -0.105676 | -2.145878 | H      | 3.428318  | -0.825120 | 2.279783  |           |
|    | C         | 2.716779  | 1.406575  | -0.473640 | C      | 4.113279  | -2.423395 | -0.378636 |           |
|    | C         | 2.910988  | 1.286354  | -1.811073 | H      | 4.688090  | -3.181079 | 0.130646  |           |
| 15 | H         | 2.954418  | -0.527975 | -3.127593 | H      | 4.257098  | -2.326542 | -1.443661 |           |
|    | H         | 3.075409  | 2.095165  | -2.499797 | 75     | C         | -0.408445 | 3.058934  | -1.164681 |
|    | N         | 2.456376  | 0.123602  | 0.039091  | H      | 0.409105  | 3.667884  | -1.544528 |           |
|    | C         | 2.518206  | 2.611026  | 0.416103  | H      | -0.815499 | 2.487706  | -1.997583 |           |
|    | C         | 1.075205  | 2.517617  | 0.857717  | H      | -1.187468 | 3.716947  | -0.788918 |           |
| 20 | C         | -1.135957 | 2.209857  | 0.502934  | C      | 0.631411  | 3.032092  | 1.102169  |           |
|    | C         | -0.887705 | 1.910385  | 1.820074  | 80     | H         | -0.160972 | 3.669544  | 1.487177  |
|    | C         | 0.507992  | 2.104244  | 2.044573  | H      | 1.018445  | 2.440990  | 1.930022  |           |
|    | N         | 0.063558  | 2.557403  | -0.070701 | H      | 1.433688  | 3.662048  | 0.726658  |           |
|    | H         | -1.625194 | 1.625838  | 2.548127  | C      | -3.216296 | -1.789041 | -1.584069 |           |
| 25 | H         | 0.184084  | 2.846379  | -1.026737 | H      | -3.845421 | -2.544129 | -2.027921 |           |
|    | H         | 1.028735  | 1.967149  | 2.974565  | 85     | H         | -2.523592 | -1.292642 | -2.249879 |
|    | H         | 2.816957  | -0.121972 | 0.950226  | C      | -4.292475 | -2.187279 | 0.615001  |           |
|    | C         | 3.442586  | 2.563921  | 1.634778  | H      | -3.771893 | -2.682447 | 1.433626  |           |
|    | H         | 3.253681  | 3.418248  | 2.281354  | H      | -4.987658 | -1.470803 | 1.049705  |           |
| 30 | H         | 3.304089  | 1.660044  | 2.225565  | H      | -4.857123 | -2.931891 | 0.064179  |           |
|    | H         | 4.476917  | 2.599685  | 1.303368  | 90     | Li        | 0.205956  | -0.761606 | -0.831201 |
|    | C         | 2.777689  | 3.900231  | -0.363632 |        |           |           |           |           |
|    | H         | 3.809931  | 3.920481  | -0.704917 |        |           |           |           |           |
|    | H         | 2.134468  | 3.993195  | -1.236718 |        |           |           |           |           |
| 35 | H         | 2.607767  | 4.758769  | 0.281144  | Li-328 |           |           |           |           |
|    | C         | 2.108853  | -2.748555 | 0.393951  | 95     | C         | 3.204405  | 1.382307  | -0.827092 |
|    | H         | 2.020274  | -3.814395 | 0.533170  | C      | 2.607836  | 0.351373  | 0.020004  |           |
|    | H         | 1.918291  | -2.136150 | 1.264773  | C      | 2.613177  | 0.229474  | 1.394931  |           |
|    | C         | 2.721906  | -3.108934 | -1.983024 | C      | 1.466873  | -1.532200 | 0.558728  |           |
| 40 | H         | 2.039629  | -2.865297 | -2.796447 | C      | 1.891258  | -0.951978 | 1.733921  |           |
|    | H         | 3.737273  | -2.955963 | -2.345154 | 100    | H         | 3.105514  | 0.896881  | 2.078059  |
|    | H         | 2.595777  | -4.155718 | -1.728154 | H      | 1.735921  | -1.345822 | 2.721528  |           |
|    | H         | -2.055729 | 2.248308  | -0.050674 | N      | 1.882670  | -0.717418 | -0.461749 |           |
|    | Li        | 0.375726  | 0.439446  | 0.465779  | C      | 0.567027  | -2.713425 | 0.275272  |           |
| 45 |           |           |           |           | C      | -0.654657 | -2.109951 | -0.367277 |           |
|    |           |           |           |           | 105    | C         | -2.265897 | -0.529207 | -0.509237 |
|    |           |           |           |           | C      | -2.185411 | -1.147637 | -1.722296 |           |
|    | Li-261    |           |           |           | C      | -1.163375 | -2.149690 | -1.632276 |           |
|    |           |           |           |           | C      | -2.965200 | 0.715179  | -0.026687 |           |
| 50 | C         | -3.318913 | -1.491114 | -0.289113 | C      | -1.849420 | 1.678676  | 0.310443  |           |
|    | C         | -2.492937 | -0.465513 | 0.339265  | 110    | C         | -1.378105 | 2.161263  | 1.512629  |
|    | C         | -2.386816 | -0.099465 | 1.646012  | C      | -0.206944 | 2.932115  | 1.243294  |           |
|    | C         | -1.009265 | 1.257082  | 0.479033  | C      | 0.008320  | 2.888452  | -0.110964 |           |
|    | C         | -1.448264 | 0.980122  | 1.733251  | N      | -1.318165 | -1.107481 | 0.309842  |           |
|    | H         | -2.912036 | -0.551376 | 2.467551  | N      | -0.980195 | 2.109436  | -0.657827 |           |
| 55 | H         | -1.136419 | 1.477130  | 2.633951  | 115    | H         | -2.767110 | -0.908844 | -2.594085 |
|    | N         | -1.598408 | 0.328310  | -0.396054 | H      | -1.839170 | 2.015197  | 2.472279  |           |
|    | C         | 0.089359  | 2.160204  | -0.030696 | H      | 0.382290  | 3.478369  | 1.956683  |           |
|    | C         | 1.148091  | 1.214696  | -0.549160 | H      | -1.355998 | -1.054944 | 1.314232  |           |
|    | C         | 2.487774  | -0.619990 | -0.401027 |        |           |           |           |           |



|    |           |           |           |           |     |          |           |           |           |
|----|-----------|-----------|-----------|-----------|-----|----------|-----------|-----------|-----------|
| H  | -0.838074 | -2.798761 | -2.424845 | 60        | H   | 0.839139 | 2.124244  | 1.384076  |           |
| H  | -1.080550 | 1.901869  | -1.636268 |           | C   | 3.848421 | -2.208275 | 0.253328  |           |
| H  | 1.701216  | -0.907350 | -1.431938 |           | H   | 3.990437 | -1.319093 | -0.358864 |           |
| C  | -3.806252 | 0.435419  | 1.220983  |           | H   | 4.633812 | -2.241420 | 1.001590  |           |
| 5  | H         | -3.213281 | 0.015682  | 2.032118  |     | H        | 3.945946  | -3.080037 | -0.392392 |
|    | H         | -4.264847 | 1.354840  | 1.578862  | 65  | C        | 2.354472  | -2.256786 | 2.230911  |
|    | H         | -4.591674 | -0.273691 | 0.973465  |     | H        | 1.391941  | -2.263440 | 2.721003  |
|    | C         | -3.867213 | 1.283211  | -1.122879 |     | H        | 3.218046  | -2.323661 | 2.874064  |
|    | H         | -4.337605 | 2.199445  | -0.774977 |     | C        | -3.042667 | -2.176512 | -1.760920 |
| 10 | H         | -3.316186 | 1.503309  | -2.034990 |     | H        | -2.758024 | -1.337882 | -2.394660 |
|    | H         | -4.644744 | 0.562573  | -1.365747 | 70  | H        | -2.827053 | -3.094416 | -2.303758 |
|    | C         | 1.243888  | -3.699861 | -0.677764 |     | H        | -4.113217 | -2.120755 | -1.582295 |
|    | H         | 0.563907  | -4.519272 | -0.899499 |     | C        | -2.753491 | -3.374788 | 0.406632  |
|    | H         | 1.527057  | -3.231183 | -1.618001 |     | H        | -2.556976 | -4.293370 | -0.140347 |
| 15 | H         | 2.138859  | -4.105676 | -0.213207 |     | H        | -2.237362 | -3.428925 | 1.362868  |
|    | C         | 0.220484  | -3.432472 | 1.580345  | 75  | H        | -3.821194 | -3.305009 | 0.601813  |
|    | H         | 1.123334  | -3.824997 | 2.043396  |     | C        | -1.515976 | 3.587856  | 1.473537  |
|    | H         | -0.267408 | -2.774121 | 2.297535  |     | H        | -2.503555 | 3.760541  | 1.894959  |
|    | H         | -0.450020 | -4.260852 | 1.367489  |     | H        | -0.895479 | 3.157548  | 2.257698  |
| 20 | C         | 3.118129  | 1.354978  | -2.155291 |     | H        | -1.095135 | 4.545287  | 1.176108  |
|    | H         | 3.577755  | 2.128654  | -2.750333 | 80  | C        | -2.572004 | 3.313065  | -0.768129 |
|    | H         | 2.622356  | 0.563504  | -2.698562 |     | H        | -2.170370 | 4.268419  | -1.099112 |
|    | C         | 3.926962  | 2.474294  | -0.094673 |     | H        | -2.717434 | 2.680823  | -1.642072 |
|    | H         | 3.261475  | 2.978256  | 0.606868  |     | H        | -3.543424 | 3.477753  | -0.309506 |
| 25 | H         | 4.757588  | 2.064728  | 0.478406  |     | C        | 3.444542  | 1.195849  | 1.379867  |
|    | H         | 4.317959  | 3.206800  | -0.793105 | 85  | H        | 4.442017  | 0.985570  | 1.733330  |
|    | H         | 0.757834  | 3.352599  | -0.724365 |     | H        | 2.657934  | 1.168746  | 2.119543  |
|    | Li        | 0.382706  | 0.689712  | 0.694151  |     | C        | 4.323810  | 1.465793  | -0.924927 |
|    |           |           |           |           |     | H        | 4.118630  | 0.755512  | -1.726259 |
| 30 |           |           |           |           |     | H        | 4.419908  | 2.450754  | -1.379160 |
|    | Li-368    |           |           |           | 90  | H        | 5.269305  | 1.199400  | -0.463590 |
|    |           |           |           |           |     | Li       | 0.346162  | -0.013630 | -0.716086 |
|    |           |           |           |           |     |          |           |           |           |
|    | C         | 3.223093  | 1.460133  | 0.095328  |     |          |           |           |           |
|    | C         | 1.891015  | 1.777168  | -0.419012 |     |          |           |           |           |
| 35 | C         | 1.458988  | 1.906286  | -1.722451 |     | Na-170   |           |           |           |
|    | C         | -0.285049 | 2.414199  | -0.372940 | 95  |          |           |           |           |
|    | C         | 0.091078  | 2.303879  | -1.692809 |     | C        | -2.005645 | -3.339793 | -0.077750 |
|    | H         | 2.067806  | 1.772947  | -2.597536 |     | C        | -0.709234 | -3.038119 | -0.692323 |
|    | H         | -0.527026 | 2.523629  | -2.544066 |     | C        | -0.335069 | -2.805345 | -2.005860 |
| 40 | N         | 0.802493  | 2.053375  | 0.382913  |     | C        | 1.068428  | -2.599327 | -2.030592 |
|    | C         | -1.633979 | 2.668509  | 0.258014  | 100 | C        | 1.538762  | -2.708132 | -0.731936 |
|    | C         | -2.146342 | 1.313361  | 0.673372  |     | C        | 2.887559  | -2.621335 | -0.163955 |
|    | C         | -2.528367 | -0.889198 | 0.336809  |     | N        | 0.440947  | -2.959068 | 0.057857  |
|    | C         | -2.812471 | -0.613663 | 1.643210  |     | H        | -0.987251 | -2.856426 | -2.858994 |
| 45 | C         | -2.570784 | 0.782585  | 1.856562  |     | H        | 1.677969  | -2.465222 | -2.905958 |
|    | C         | -2.303221 | -2.171025 | -0.422319 | 105 | H        | 0.490825  | -3.181330 | 1.036922  |
|    | C         | -0.809075 | -2.203546 | -0.654158 |     | C        | 3.896240  | -2.131215 | -0.879190 |
|    | C         | -0.036492 | -2.113817 | -1.793015 |     | H        | 4.895506  | -2.099641 | -0.473991 |
|    | C         | 1.329480  | -2.068573 | -1.381326 |     | H        | 3.759571  | -1.767114 | -1.886425 |
| 50 | C         | 1.359086  | -2.124231 | -0.001355 |     | C        | 3.069042  | -3.129495 | 1.238483  |
|    | C         | 2.500824  | -2.189254 | 0.910291  | 110 | H        | 2.492858  | -2.543817 | 1.957195  |
|    | N         | -2.105524 | 0.286160  | -0.244042 |     | H        | 2.755108  | -4.170207 | 1.319687  |
|    | N         | 0.047792  | -2.176736 | 0.411987  |     | H        | 4.112052  | -3.065600 | 1.529067  |
|    | H         | -3.132133 | -1.323236 | 2.384747  |     | C        | -3.136657 | -3.164061 | -0.755348 |
| 55 | H         | -0.400288 | -2.125394 | -2.804039 |     | H        | -3.145217 | -2.781273 | -1.764886 |
|    | H         | 2.191511  | -2.047507 | -2.022761 | 115 | H        | -4.088239 | -3.418974 | -0.315771 |
|    | H         | -2.084123 | 0.438529  | -1.238337 |     | C        | -1.984958 | -3.871388 | 1.327587  |
|    | H         | -2.685975 | 1.313400  | 2.783712  |     | H        | -1.382520 | -4.777506 | 1.392782  |
|    | H         | -0.258825 | -2.211747 | 1.368495  |     | H        | -1.577041 | -3.141079 | 2.028877  |

|           |           |           |           |           |            |           |           |           |           |
|-----------|-----------|-----------|-----------|-----------|------------|-----------|-----------|-----------|-----------|
| H         | -2.991653 | -4.108495 | 1.654289  | <b>60</b> | N          | 0.497411  | -2.907494 | 0.128240  |           |
| Na        | 0.060537  | -0.483369 | -0.925671 |           | H          | -1.068930 | -2.043730 | -2.583039 |           |
|           |           |           |           |           | H          | 1.572319  | -1.529180 | -2.607372 |           |
|           |           |           |           |           | H          | 1.907729  | -1.059755 | 2.675640  |           |
| <b>5</b>  | Na-237    |           |           |           | H          | 0.590335  | -3.355028 | 1.021902  |           |
|           |           |           |           | <b>65</b> | C          | 3.988763  | -2.153076 | -1.024592 |           |
| C         | -1.832364 | -0.846027 | 1.408668  |           | H          | 3.764190  | -1.500319 | -1.865806 |           |
| C         | -1.995939 | 0.056155  | 0.377126  |           | H          | 4.935907  | -1.846731 | -0.586049 |           |
| N         | -2.712974 | -0.581567 | -0.597684 |           | H          | 4.097185  | -3.159449 | -1.420485 |           |
| <b>10</b> | C         | -3.021335 | -1.859191 | -0.212714 | C          | 3.223510  | -3.178610 | 1.110490  |           |
|           | C         | -2.478899 | -2.058601 | 1.032052  | <b>70</b>  | H         | 2.522260  | -3.163100 | 1.942801  |
|           | H         | -2.586307 | -2.946262 | 1.628407  |            | H         | 3.224680  | -4.174606 | 0.673187  |
|           | H         | -3.036713 | -0.146926 | -1.442271 |            | H         | 4.210088  | -2.976116 | 1.519367  |
|           | C         | 3.391423  | -0.266650 | 0.235482  |            | C         | -3.079981 | -3.233644 | -0.688773 |
| <b>15</b> | C         | 2.116785  | 0.094076  | -0.392794 |            | H         | -3.138228 | -2.731979 | -1.642472 |
|           | C         | 1.671443  | 0.022267  | -1.699617 | <b>75</b>  | H         | -3.994153 | -3.644217 | -0.289708 |
|           | C         | 0.369183  | 0.588907  | -1.745561 |            | C         | -1.850879 | -4.071729 | 1.293686  |
|           | C         | 0.036134  | 0.987735  | -0.466772 |            | H         | -1.177028 | -4.927428 | 1.237143  |
|           | C         | -1.304803 | 1.379409  | 0.118147  |            | H         | -1.494514 | -3.409446 | 2.084792  |
| <b>20</b> | N         | 1.100257  | 0.671203  | 0.332648  |            | H         | -2.829999 | -4.436495 | 1.585080  |
|           | H         | 2.246038  | -0.323775 | -2.539221 | <b>80</b>  | C         | 2.312987  | 3.928722  | 1.143695  |
|           | H         | -0.237393 | 0.709486  | -2.625041 |            | H         | 1.303268  | 3.838214  | 1.543321  |
|           | H         | -1.330270 | -0.657146 | 2.340274  |            | H         | 3.005867  | 3.861222  | 1.980929  |
|           | H         | 1.167788  | 0.903366  | 1.307008  |            | H         | 2.411931  | 4.906771  | 0.684883  |
| <b>25</b> | C         | -2.083566 | 2.238012  | -0.878257 |            | C         | 2.917547  | 3.118635  | -1.121392 |
|           | H         | -2.155690 | 1.777107  | -1.861540 | <b>85</b>  | H         | 3.007794  | 4.138793  | -1.459412 |
|           | H         | -3.087619 | 2.425610  | -0.503758 |            | H         | 3.106975  | 2.351672  | -1.858684 |
|           | H         | -1.577130 | 3.190831  | -1.007785 | Na         | 0.210690  | -0.136088 | -0.002303 |           |
|           | C         | -1.145522 | 2.154198  | 1.426406  |            |           |           |           |           |
| <b>30</b> | H         | -0.673057 | 1.563070  | 2.208699  |            |           |           |           |           |
|           | H         | -0.552852 | 3.050650  | 1.257193  | <b>90</b>  | Na-344    |           |           |           |
|           | H         | -2.124529 | 2.449109  | 1.795081  |            |           |           |           |           |
|           | C         | 4.329169  | -0.919662 | -0.443954 |            | C         | 0.538901  | 2.226568  | -1.671521 |
|           | H         | 4.190445  | -1.212846 | -1.473350 |            | C         | 0.132787  | 2.096290  | -0.375864 |
| <b>35</b> | H         | 5.271427  | -1.168697 | 0.017981  |            | N         | 1.063655  | 1.301507  | 0.268644  |
|           | C         | 3.585450  | 0.147709  | 1.666861  | <b>95</b>  | C         | 2.087324  | 0.976449  | -0.603322 |
|           | H         | 3.501098  | 1.229401  | 1.776088  |            | C         | 1.774858  | 1.518640  | -1.815295 |
|           | H         | 2.848705  | -0.318857 | 2.323628  |            | H         | 2.354197  | 1.428714  | -2.715957 |
|           | H         | 4.569095  | -0.149477 | 2.013960  |            | C         | 3.186357  | 0.046276  | -0.157934 |
| <b>40</b> | H         | -3.643877 | -2.491816 | -0.817968 |            | C         | 2.525183  | -1.269084 | 0.180336  |
|           | Na        | -0.120281 | -1.710935 | -0.462961 | <b>100</b> | C         | 2.323004  | -1.919448 | 1.377503  |
|           |           |           |           |           |            | C         | 1.295053  | -3.110319 | -0.236773 |
|           |           |           |           |           |            | C         | 1.545882  | -3.086437 | 1.111955  |
|           |           |           |           |           |            | H         | 2.720645  | -1.620742 | 2.330142  |
|           |           |           |           |           |            | H         | 1.251205  | -3.840433 | 1.818778  |
| <b>45</b> | Na-277    |           |           |           | <b>105</b> | N         | 1.879419  | -1.997047 | -0.783651 |
|           |           |           |           |           |            | H         | 1.185006  | 1.311937  | 1.267269  |
|           | C         | 2.164851  | -0.400720 | 1.866348  |            | C         | -3.369850 | -1.817487 | -0.692749 |
|           | C         | 2.737583  | -0.771064 | 0.668507  |            | C         | -2.828506 | -0.770773 | 0.179871  |
|           | N         | 2.908598  | 0.374932  | -0.062563 |            | C         | -2.748070 | -0.663017 | 1.553986  |
|           | C         | 2.484819  | 1.478231  | 0.642181  |            | C         | -2.134226 | 0.585262  | 1.856864  |
| <b>50</b> | C         | 2.005188  | 1.013782  | 1.849721  | <b>110</b> | C         | -1.858552 | 1.218202  | 0.664856  |
|           | H         | 1.631830  | 1.626833  | 2.649671  |            | C         | -1.131047 | 2.500756  | 0.339439  |
|           | C         | 2.592112  | 2.848300  | 0.140495  |            | N         | -2.273231 | 0.379611  | -0.334643 |
|           | H         | 3.404058  | 0.422206  | -0.933745 |            | H         | -3.145774 | -1.369401 | 2.259977  |
|           | C         | -1.933594 | -3.360577 | -0.027548 |            | H         | -1.961046 | 0.989450  | 2.837715  |
| <b>55</b> | C         | -0.684625 | -2.818383 | -0.570207 | <b>115</b> | H         | 0.020677  | 2.764121  | -2.444697 |
|           | C         | -0.379918 | -2.215611 | -1.776591 |            | H         | -2.203487 | 0.596266  | -1.313537 |
|           | C         | 1.018278  | -1.965296 | -1.795603 |            | H         | 1.883516  | -1.764174 | -1.760979 |
|           | C         | 1.543396  | -2.406607 | -0.597997 |            |           |           |           |           |
|           | C         | 2.890915  | -2.139989 | 0.038960  |            |           |           |           |           |
